# Supplementary material for: Epidemiology and Control of Hepatitis C Virus (Hcv) Infection in Brunei Darussalam: A Retrospective Cohort Study
Source: Research Square preprint supplement (doi:10.21203/rs.3.rs-5149746/v1), 2025-01-15
Supplement: Supplementary file 1 [file 8d84c249aa3fd2c8436c7067.docx]

**Table S1. Characteristics of HCV cases from 2013 to 2022 in Brunei Darussalam by five outcomes of interest: Treatment initiation, treatment completion, SVR achieved, presence of HCV-related complications at diagnosis, and HCV-related deaths.**

|  | | **HCV treatment initiated (n=457)** | | **HCV treatment completed (n=239)** | | **SVR achieved (n=166)** | | **Had HCV-related complications at diagnosis (n=801)** | | **Death due to HCV (n=129)** | |
| --- | --- | --- | --- | --- | --- | --- | --- | --- | --- | --- | --- |
| **Patient characteristics** | | **Yes (%)** | **No (%)** | **Yes (%)** | **No (%)** | **Yes (%)** | **No (%)** | **Yes (%)** | **No (%)** | **Yes (%)** | **No (%)** |
| Total | | 239 (52.3) | 218 (47.7) | 166 (69.5) | 73 (30.5) | 107 (64.5) | 59 (35.5) | 59 (7.4) | 742 (92.6) | 47 (36.4) | 82 (63.6) |
| Mean age (SD) | | 43.3 (9.48) | 44.3 (12.54) | 43.0 (8.70) | 44.1 (11.09) | 42.7 (7.97) | 43.7 (9.93) | 51.1 (9.46) | 42.7 (12.16) | 52.1 (9.13) | 53.6 (11.46) |
| Median age (IQR) | | 44.0 (37-50) | 44.5 (35-53) | 44.0 (37-49) | 44.0 (37-51) | 44.0 (38-47) | 45.0 (38-52) | 51.0 (44.5-57) | 43.0 (35-50) | 53.0 (45.5-56.5) | 52.5 (46-58.8) |
| Age range (years) | | 17.0 to 75.0 | 6.0 to 77.0 | 20.0 to 62.0 | 17.0 to 75.0 | 21.0 to 62.0 | 20.0 to 62.0 | 27.0 to 78.0 | 0.0 to 83.0 | 39.0 to 78.0 | 30.0 to 83.0 |
| Age group (years) | 0-29 | 18 (7.5) | 31 (14.2) | 11 (6.6) | 7 (9/6) | 6 (5.6) | 5 (8.5) | 1 (1.7) | 97 (13.1) | 0 (0.0) | 0 (0.0) |
| 30-39 | 60 (25.1) | 47 (21.6) | 43 (25.9) | 17 (23.3) | 28 (26.2) | 15 (25.4) | 4 (6.8) | 181 (24.4) | 1 (2.1) | 8 (9.8) |
| 40-44 | 48 (20.1) | 31 (14.2) | 34 (20.5) | 14 (19.2) | 27 (25.2) | 7 (11.9) | 10 (16.9) | 124 (16.7) | 7 (14.9) | 7 (8.5) |
| 45-49 | 49 (20.5) | 35 (16.1) | 39 (23.5) | 10 (13.7) | 26 (24.3) | 13 (22.0) | 10 (16.9) | 133 (17.9) | 9 (19.2) | 16 (19.5) |
| 50-59 | 57 (23.9) | 55 (25.2) | 37 (22.3) | 20 (27.4) | 19 (17.8) | 18 (30.5) | 24 (40.8) | 164 (22.1) | 22 (46.8) | 32 (39.0) |
| 60+ | 7 (2.9) | 19 (8.7) | 2 (1.2) | 5 (6.8) | 1 (0.9) | 1 (1.7) | 10 (16.9) | 43 (5.8) | 8 (17.0) | 19 (23.2) |
| Gender | Male | 201 (84.1) | 168 (77.1) | 142 (85.5) | 59 (80.8) | 94 (87.9) | 48 (81.4) | 44 (74.6) | 618 (83.3) | 30 (63.8) | 59 (72.0) |
| Female | 38 (15.9) | 50 (22.9) | 24 (14.5) | 14 (19.2) | 13 (12.1) | 11 (18.6) | 15 (25.4) | 124 (16.7) | 17 (36.2) | 23 (28.0) |
| Nationality | Local | 228 (95.4) | 190 (87.2) | 161 (97.0) | 67 (91.8) | 103 (96.3) | 58 (98.3) | 55 (93.2) | 636 (85.7) | 45 (95.7) | 80 (97.6) |
| Foreign | 11 (4.6) | 28 (12.8) | 5 (3.0) | 6 (8.2) | 4 (3.7) | 1 (1.7) | 4 (6.8) | 106 (14.3) | 2 (4.3) | 2 (2.4) |
| Ethnicity | Malay | 99 (41.4) | 96 (44.0) | 117 (70.5) | 53 (72.6) | 75 (70.1) | 42 (71.1) | 44 (74.5) | 486 (65.5) | 34 (72.3) | 61 (74.4) |
| Chinese | 101 (42.3) | 97 (44.5) | 18 (10.8) | 1 (1.4) | 10 (9.3) | 8 (13.6) | 4 (6.8) | 50 (6.7) | 2 (4.3) | 7 (8.5) |
| Others | 2 (0.8) | 3 (1.4) | 10 (6.0) | 2 (2.7) | 9 (8.4) | 1 (1.7) | 5 (8.5) | 73 (9.8) | 2 (4.3) | 4 (4.9) |
| Unknown | 37 (15.5) | 22 (10.1) | 21 (12.7) | 17 (23.3) | 13 (12.2) | 8 (13.6) | 6 (10.2) | 133 (18.0) | 9 (19.1) | 10 (12.2) |
| District of residence | Brunei-Muara | 88 (36.8) | 55 (25.2) | 76 (45.8) | 23 (31.5) | 52 (48.6) | 24 (40.7) | 27 (45.8) | 332 (44.7) | 19 (40.4) | 40 (48.8) |
| Belait | 55 (23.0) | 31 (14.2) | 64 (38.5) | 37 (50.7) | 41 (38.3) | 23 (39.0) | 28 (47.4) | 301 (40.6) | 23 (49.0) | 33 (40.2) |
| Temburong | 65 (27.2) | 63 (28.9) | 1 (0.6) | 1 (1.4) | 1 (0.9) | 0 (0.0) | 0 (0.0) | 11 (1.5) | 0 (0.0) | 1 (1.2) |
| Tutong | 31 (13.0) | 69 (31.7) | 25 (15.1) | 12 (16.4) | 13 (12.2) | 12 (20.3) | 4 (6.8) | 98 (13.2) | 5 (10.6) | 8 (9.8) |
| Year of diagnosis | 2013-2014 | 88 (36.8) | 55 (25.2) | 72 (43.4) | 16 (21.9) | 38 (35.5) | 34 (57.6) | 12 (20.3) | 231 (31.1) | 21 (44.7) | 40 (48.7) |
| 2015-2016 | 55 (23.0) | 31 (14.2) | 43 (25.9) | 12 (16.4) | 31 (29.0) | 12 (20.4) | 11 (18.6) | 166 (22.4) | 11 (23.4) | 18 (22.0) |
| 2017-2019 | 65 (27.2) | 63 (28.9) | 45 (27.1) | 20 (27.4) | 33 (30.8) | 12 (20.4) | 26 (44.1) | 185 (24.9) | 10 (21.3) | 15 (18.3) |
| 2020-2022 | 31 (13.0) | 69 (31.7) | 6 (3.6) | 25 (34.3) | 5 (4.7) | 1 (1.6) | 10 (17.0) | 160 (21.6) | 5 (10.6) | 9 (11.0) |
